# Supplementary material for: NH-rich red poly(heptazine imide) nanoparticles with simultaneously promoted exciton dissociation and activated n → π* electronic transition for boosted photocatalytic H2 generation
Source: Royal Society of Chemistry journal article supplement (doi:10.1039/d2ta04213d), 2022-01-01
Supplement: d2ta04213d1.pdf [file d2ta04213d1.pdf]

**NH-rich red poly(heptazine imide) nanoparticle with simultaneously promoted exciton dissociation and activated  $n \rightarrow \pi^*$  electronic transition for boosted photocatalytic  $H_2$  generation**

Zhengliang Zhao <sup>a</sup>, Zhu Shu <sup>a,b,\*</sup>, Jun Zhou <sup>a,b</sup>, Lina Ye <sup>a</sup>, Tiantian Li <sup>c</sup>, Wenbin Wang <sup>a</sup>, Lina Xu <sup>a</sup>

<sup>a</sup> Engineering Research Center of Nano-Geomaterials of Ministry of Education, Faculty of Materials Science and Chemistry, China University of Geosciences, 388 Lumo Road, Wuhan 430074, China

<sup>b</sup> Hubei Three Gorges Laboratory, 1 Mazongling Road, Yichang 443007, China

<sup>c</sup> College of Chemistry and Chemical Engineering, Henan Province Key Laboratory of Utilization of Non-metallic Mineral in the South of Henan, Xinyang Normal University, Xinyang 464000, China

\* Corresponding authors at: 388 Lumo Road, Wuhan 430074, China.

E-mail address: [shuzhu@cug.edu.cn](mailto:shuzhu@cug.edu.cn) (Zhu Shu)

## 1 Experimental Section

To explore the origin of red, several reference samples were synthesized as follows:

(1) Melamine (2 g) and NaCl (6 g) or RbCl (6 g) were thoroughly ground with KSCN (1 g), and the mixture was calcined according to the heating procedure of RPHIx NP. The final samples were denoted as RPHI-NaCl and RPHI-RbCl, respectively.

(2) Melamine (2 g) and KCl (6 g) were thoroughly ground with NaSCN (1 g), and the mixture was calcined according to the heating procedure of RPHIx NP. The final samples were denoted as RPHI-NaSCN.

(3) KCl (6 g) and KSCN (1 g) were heated with the same calcining procedure as RPHIx NP, and the final sample color was white (Fig. S7).

(4) Melamine (2 g) and KSCN (1 g) were calcined with the same procedure as RPHIx NP, and the aqueous solution of obtained sample was reddish brown, while the sample was hardly available after washing (Fig. S8).

**Table S1** The parameters for apparent quantum efficiency (AQE) calculation

| Parameter      | Description                             | Data                                     |
|----------------|-----------------------------------------|------------------------------------------|
| M              | Mole number of H <sub>2</sub> evolution | Determined in the test (mol)             |
| N <sub>A</sub> | Avogadro constant                       | 6.022×10 <sup>23</sup> mol <sup>-1</sup> |
| h              | Planck constant                         | 6.626×10 <sup>-34</sup> J s              |
| c              | Speed of light                          | 3×10 <sup>8</sup> m s <sup>-1</sup>      |
| P              | Power of lamp                           | 23.5 mW cm <sup>-2</sup>                 |
| S              | Irradiated area                         | 38.465 cm <sup>2</sup>                   |
| t              | Reaction time                           | Determined in the test (s)               |
| λ              | Wavelength of monochromatic light       | Determined in the test                   |

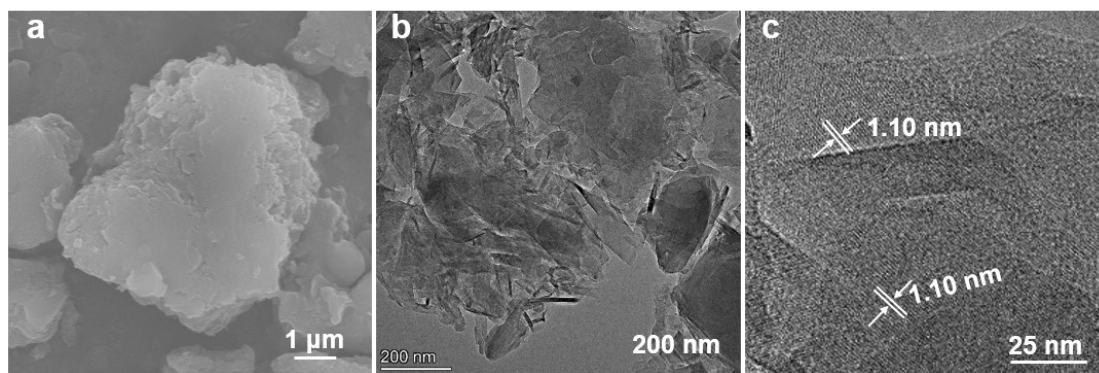

**Fig. S1** (a) SEM; (b) TEM and (c) HRTEM images of PHI.

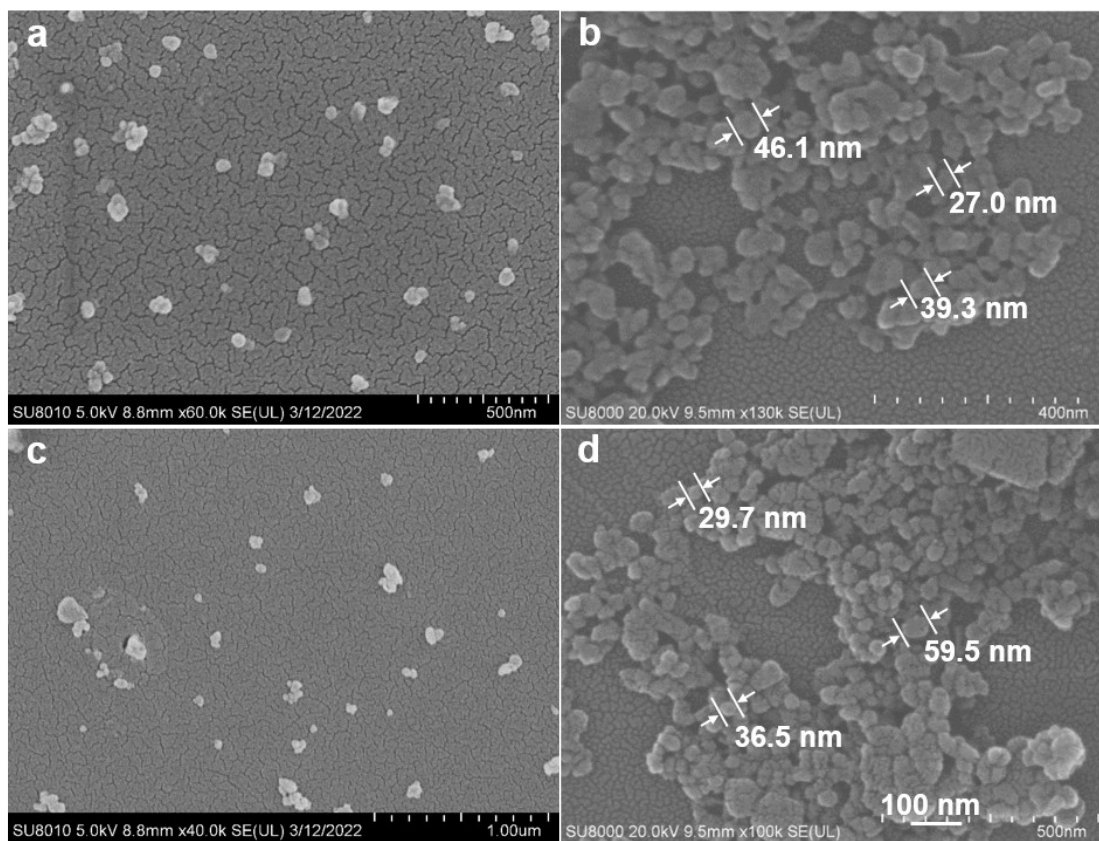

**Fig. S2** SEM images of (a) (in ethanol) and (b) of RPHI0.75 NP; (c) (in ethanol) and (d) of RPHI1.1 NP.

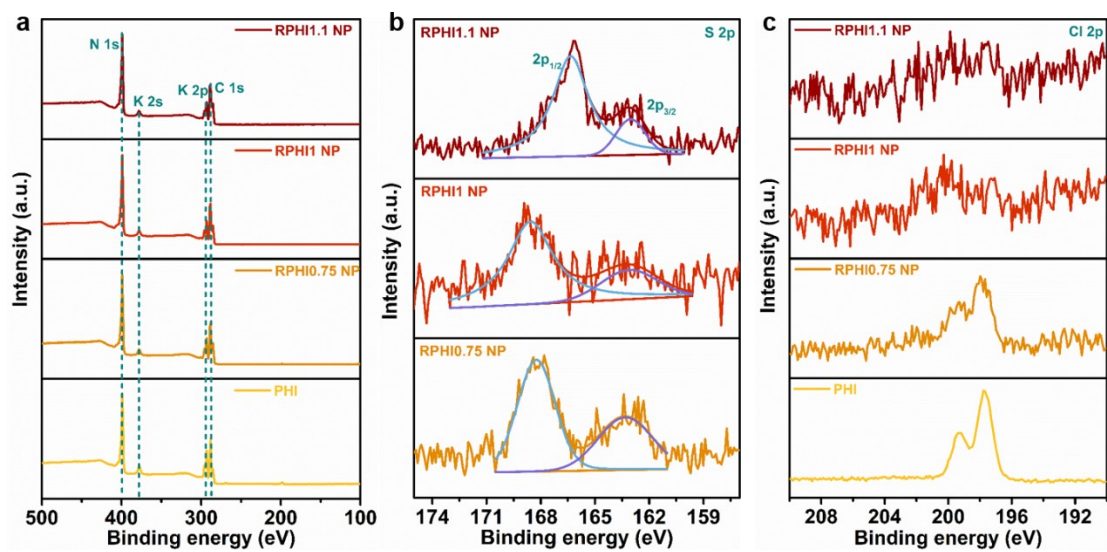

**Fig. S3** XPS spectra of PHI and RPHIx NP: (a) Survey; (b) S 2p; (c) Cl 2p.

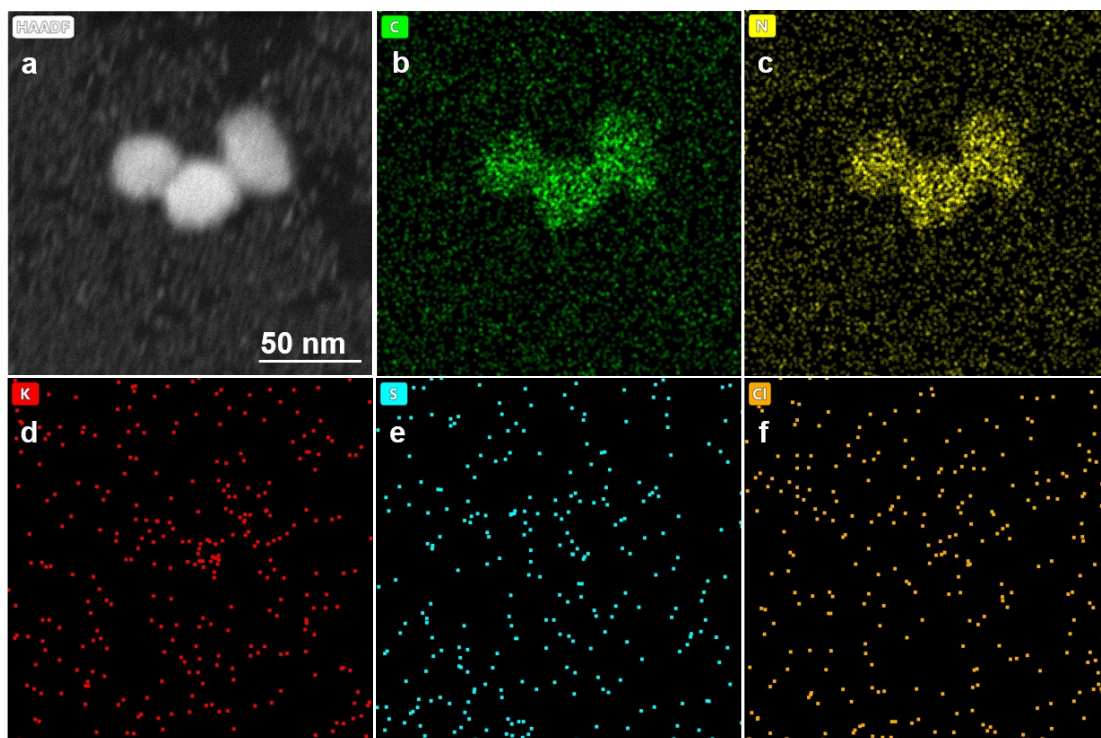

**Fig. S4** EDS mapping of RPHI1 NP.

**Table S2** The contents of C, N, K, O, Cl and S in PHI and RPHIx NP measured by XPS.

| Samples     | C (at%) | N (at%) | K (at%) | Cl (at%) | S (at%) | C/N (%) |
|-------------|---------|---------|---------|----------|---------|---------|
| PHI         | 42.15   | 47.11   | 5.08    | 0.45     | –       | 89.5    |
| RPHI0.75 NP | 40.05   | 49.46   | 4.26    | 0.1      | 0.08    | 81.0    |
| RPHI1 NP    | 39.83   | 50.37   | 3.84    | 0.04     | 0.05    | 78.8    |
| RPHI1.1 NP  | 39.96   | 51.3    | 3.63    | 0.04     | 0.09    | 77.9    |



**Table S3** Area ratio of deconvoluted peaks of  $^{13}\text{C}$  NMR in Fig. 3a for PHI and RPHIx NP.

|             | C-N <sub>2</sub> -(NH <sub>x</sub> ) (C2) | C-N <sub>3</sub> (C3) | C2/C3 |
|-------------|-------------------------------------------|-----------------------|-------|
| PHI         | 0.015                                     | 0.011                 | 1.36  |
| RPHI0.75 NP | 0.006                                     | 0.004                 | 1.5   |
| RPHI1 NP    | 0.007                                     | 0.005                 | 1.4   |
| RPHI1.1 NP  | 0.008                                     | 0.004                 | 2.0   |

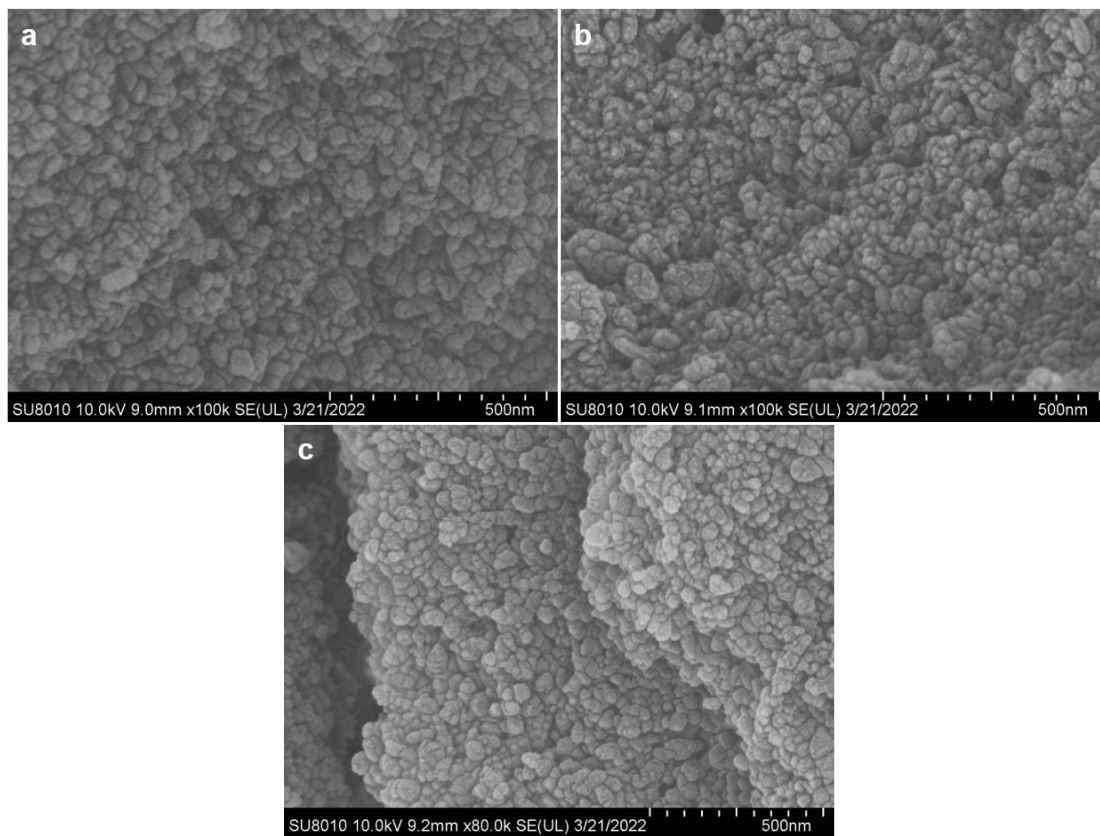

**Fig. S5** SEM images of (a) RPHI-NaCl; (b) RPHI-RbCl and (c) RPHI-NaSCN.

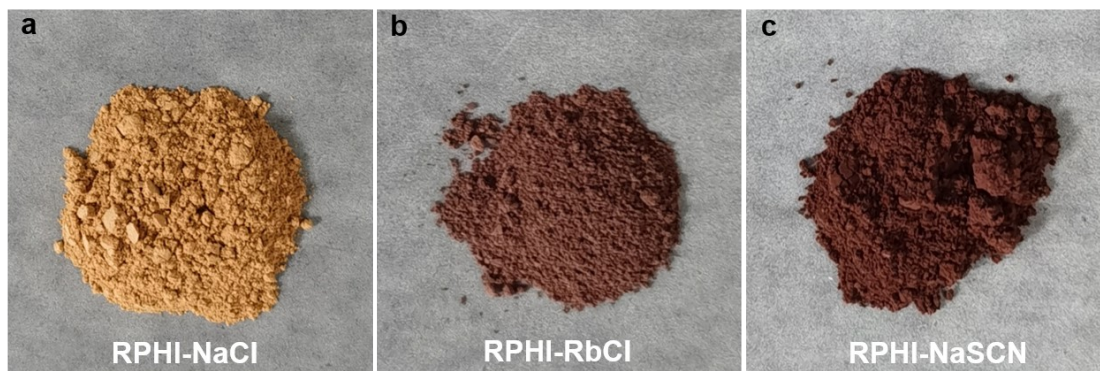

**Fig. S6** The optical image of (a) RPHI-NaCl; (b) RPHI-RbCl and (c) RPHI-NaSCN.

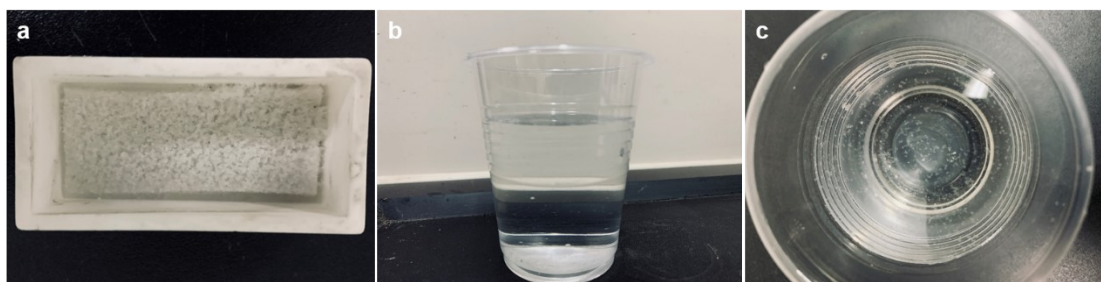

**Fig. S7** Images of calcined products of KCl and KSCN: (a) after cooling; (b) and (c) after dissolving in water.

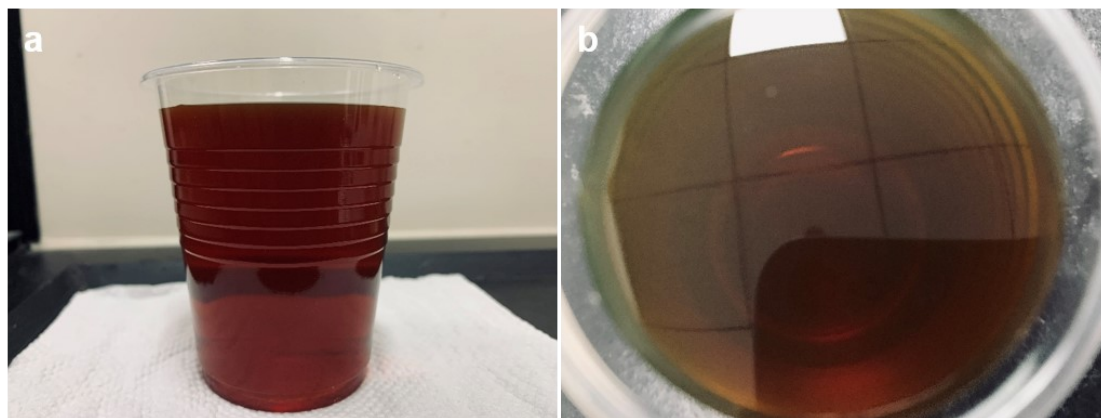

**Fig. S8** Images of calcined products of melamine and KSCN dissolved in water.

**Table S4** Fluorescence lifetimes and their percentages of photo-induced carriers in PHI and RPHIx NP.

| Samples     | $\tau_1/\text{ns}$ | $A_1/\%$ | $\tau_2/\text{ns}$ | $A_2/\%$ | $\tau_3/\text{ns}$ | $A_3/\%$ | $\tau/\text{ns}$ |
|-------------|--------------------|----------|--------------------|----------|--------------------|----------|------------------|
| PHI         | 5.04               | 70.64    | 38.68              | 29.36    | —                  | —        | 14.92            |
| RPHI0.75 NP | 0.57               | 73.37    | 3.22               | 23.38    | 22.0               | 3.24     | 1.88             |
| RPHI1 NP    | 0.59               | 72.28    | 3.07               | 24.04    | 16.9               | 3.68     | 1.79             |
| RPHI1.1 NP  | 0.62               | 76.56    | 3.33               | 20.40    | 33.74              | 3.04     | 2.18             |

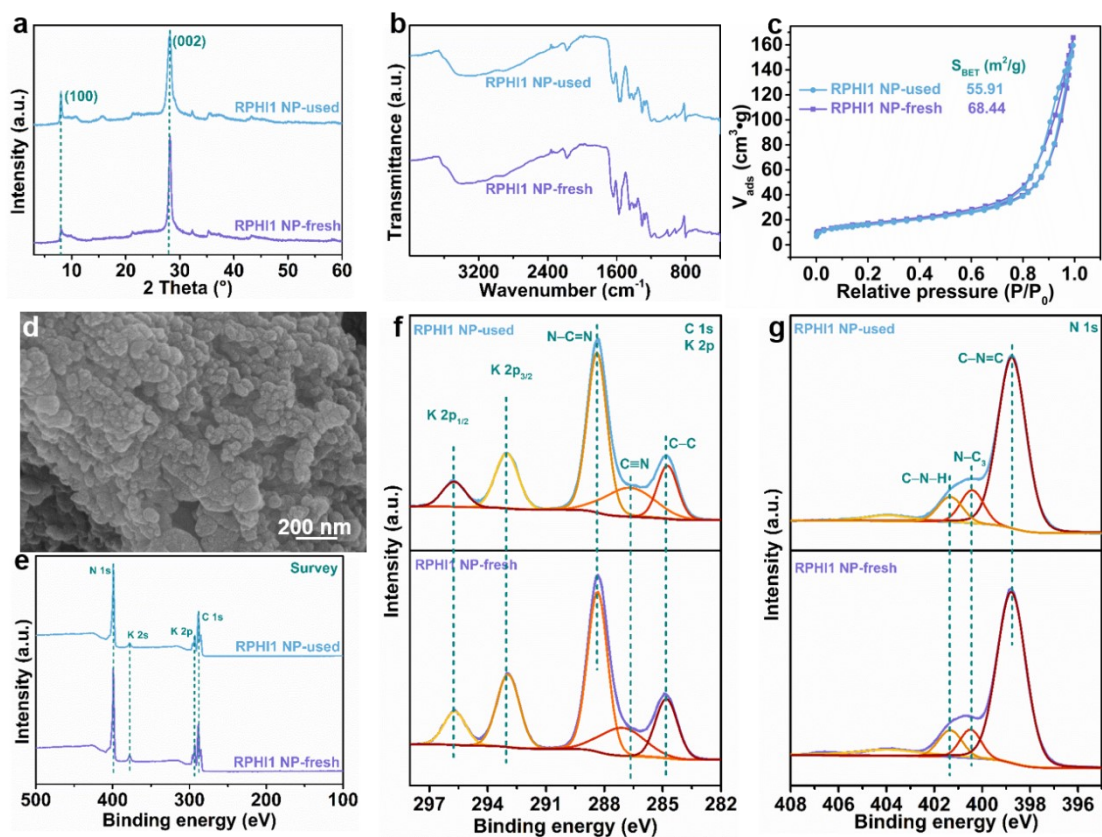

**Fig. S9** (a) XRD patterns; (b) FTIR spectra; (c) N<sub>2</sub> absorption-desorption isotherm curves of RPHI1 NP before and after H<sub>2</sub> evolution; (d) SEM image of RPHI1 NP after H<sub>2</sub> evolution; XPS spectra of (e) Survey; (f) C 1s and K 2p; (g) N 1s of RPHI1 NP before and after H<sub>2</sub> evolution.

**Table S5** HER comparison of RPHI1 NP with previously reported red PHI.

| Photocatalyst               | Light source         | Sacrificial agent (vol%) | HER rate ( $\mu\text{mol g}^{-1} \text{h}^{-1}$ ) |                            |
|-----------------------------|----------------------|--------------------------|---------------------------------------------------|----------------------------|
|                             |                      |                          | $\lambda > 420 \text{ nm}$                        | $\lambda > 510 \text{ nm}$ |
| OKCN2 <sup>1</sup>          | 300 W Xe lamp        | 20% TEOA                 | 214.3                                             | 46.1                       |
| KCN <sup>1</sup>            | 300 W Xe lamp        | 20% TEOA                 | 392.2                                             | 4.1                        |
| RPCN <sup>2</sup>           | 300 W Xe lamp        | 10% TEOA                 | 1400                                              | 640                        |
| kPCN <sup>2</sup>           | 300 W Xe lamp        | 10% TEOA                 | < RPCN                                            | —                          |
| CN-OA-M <sup>3</sup>        | LED light            | 10% TEOA                 | 168                                               | 17                         |
|                             |                      |                          | white light                                       | green light                |
| CN-M <sup>3</sup>           | LED light            | 10% TEOA                 | 300                                               | 0.45                       |
|                             |                      |                          | white light                                       | green light                |
| TKCN(0.2) <sup>4</sup>      | 300 W Xe lamp        | 20% TEOA                 | 523.8                                             | 46.7                       |
| KCN <sup>4</sup>            | 300 W Xe lamp        | 20% TEOA                 | 394.3                                             | 4.4                        |
| CN-OA-0.03 <sup>5</sup>     | green LED light      | 10% TEOA                 | —                                                 | 4                          |
| <b>RPHI1 NP [This work]</b> | <b>300 W Xe lamp</b> | <b>10% TEOA</b>          | <b>1292</b>                                       | <b>297</b>                 |
| <b>PHI [This work]</b>      | <b>300 W Xe lamp</b> | <b>10% TEOA</b>          | <b>1109</b>                                       | <b>12</b>                  |

**Reference**

1. G. Zhang, Y. Xu, C. He, P. Zhang and H. Mi, *Applied Catalysis B: Environmental*, 2021, **283**, 119636.
2. Y. Xu, M. Fan, W. Yang, Y. Xiao, L. Zeng, X. Wu, Q. Xu, C. Su and Q. He, *Advanced materials*, 2021, e2101455.
3. G. Zhang, G. Li, Z. A. Lan, L. Lin, A. Savateev, T. Heil, S. Zafeiratos, X. Wang



and M. Antonietti, *Angewandte Chemie International Edition*, 2017, **56**, 13445-13449.

4. G. Zhang, Y. Xu, H. Mi, P. Zhang, H. Li and Y. Lu, *ChemSusChem*, 2021, **14**, 4516-4524.
5. G. Zhang, A. Savateev, Y. Zhao, L. Li and M. Antonietti, *Journal of Materials Chemistry A*, 2017, **5**, 12723-12728.
